# Supplementary material for: Metal (Cd, Cr, Ni, Pb) removal from environmentally relevant waters using polyvinylpyrrolidone-coated magnetite nanoparticles
Source: PubMed Central journal article supplement (PMC9048832; doi:10.1039/c9ra10104g), 2020-01-20
Supplement: RA-010-C9RA10104G-s001.pdf [file RA-010-C9RA10104G-s001.pdf]

**Metal (Cd, Cr, Ni, Pb) removal from environmentally relevant waters using  
polyvinylpyrrolidone-coated magnetite nanoparticles**

Jie Hong<sup>a,b</sup>, Seyyedali Mirshahghassemi<sup>b</sup>, Jamie Lead<sup>b\*</sup>

<sup>a</sup>College of Environment, Zhejiang University of Technology, Hangzhou,  
Zhejiang, 310014, China

<sup>b</sup>Center for Environmental NanoScience and Risk, Department of Environmental  
Health Sciences Arnold School of Public Health, University of South Carolina,  
Columbia, SC, 29208, USA

\* Corresponding Author: Jamie Lead, Email: [jlead@mailbox.sc.edu](mailto:jlead@mailbox.sc.edu);

Table S1. Correlation ( $R^2$ ) obtained from pseudo-second-order equation of metal removal using PVP-Fe<sub>3</sub>O<sub>4</sub> NPs.

|            | Cd     | Cr     | Ni     | Pb     |
|------------|--------|--------|--------|--------|
| soft water | 0.9994 | 0.9908 | 0.9896 | 0.9996 |
| sea water  | 0.9753 | 0.9979 | 0.9974 | 0.9999 |

Table S2. Cd speciation and concentration (mol L<sup>-1</sup>) in soft water and sea water by MINTEQ.

|                                                 | Soft water | Sea Water   |
|-------------------------------------------------|------------|-------------|
| Cd(OH) <sub>2</sub> (aq)                        | 1.845E-06  | 1.5055E-13  |
| Cd(OH) <sub>3</sub> <sup>-</sup>                | 2.8891E-08 | 1.2408E-19  |
| Cd(OH) <sub>4</sub> <sup>-2</sup>               | 7.8234E-11 | 1.7662E-26  |
| Cd(SO <sub>4</sub> ) <sub>2</sub> <sup>-2</sup> | 4.143E-08  | 1.4713E-07  |
| Cd <sup>+2</sup>                                | 7.9342E-08 | 3.8722E-06  |
| Cd <sub>2</sub> OH <sup>+3</sup>                | 3.8833E-13 | 4.4723E-14  |
| CdCl <sup>+</sup>                               | 2.4415E-09 | 0.000045489 |
| CdCl <sub>2</sub> (aq)                          | 5.4408E-12 | 0.00003865  |
| CdOH <sup>+</sup>                               | 3.3329E-07 | 6.6555E-10  |
| CdSO <sub>4</sub> (aq)                          | 7.9062E-08 | 8.0915E-07  |
| Cd(CO <sub>3</sub> ) <sub>2</sub> <sup>-2</sup> | 8.1764E-05 |             |
| Cd(OH) <sub>2</sub> (aq)                        | 1.845E-06  |             |
| CdCO <sub>3</sub> (aq)                          | 4.7928E-06 |             |
| CdHCO <sub>3</sub> <sup>+</sup>                 | 1.5836E-09 |             |

Table S3. Cr speciation and concentration (mol L<sup>-1</sup>) in soft water and sea water by MINTEQ.

|                                                | Soft water | Sea Water   |
|------------------------------------------------|------------|-------------|
| Cr <sub>2</sub> O <sub>7</sub> <sup>-2</sup>   | 2.6774E-18 | 1.8322E-18  |
| CrO <sub>3</sub> Cl <sup>-</sup>               | 8.1518E-24 | 3.6526E-21  |
| CrO <sub>3</sub> SO <sub>4</sub> <sup>-2</sup> | 1.5748E-20 | 5.8925E-21  |
| CrO <sub>4</sub> <sup>-2</sup>                 | 1.7381E-05 | 0.000012363 |
| H <sub>2</sub> CrO <sub>4</sub> (aq)           | 8.3808E-22 | 7.2217E-22  |
| HCrO <sub>4</sub> <sup>-</sup>                 | 2.1219E-10 | 1.6741E-10  |
| KCr <sub>2</sub> O <sub>7</sub> <sup>-</sup>   | 5.0506E-21 | 2.4116E-20  |
| KCrO <sub>4</sub> <sup>-</sup>                 | 2.117E-08  | 1.0506E-07  |

Table S4. Ni speciation and concentration (mol L<sup>-1</sup>) in soft water and sea water by MINTEQ.

|                                                 | Soft water | Sea Water   |
|-------------------------------------------------|------------|-------------|
| Ni(OH) <sub>2</sub> (aq)                        | 6.2793E-05 | 9.6897E-11  |
| Ni(OH) <sub>3</sub> <sup>-</sup>                | 9.0213E-05 | 7.7252E-15  |
| Ni(SO <sub>4</sub> ) <sub>2</sub> <sup>-2</sup> | 1.8274E-10 | 1.1027E-08  |
| Ni <sup>+2</sup>                                | 1.6743E-07 | 0.00013915  |
| NiCl <sup>+</sup>                               | 2.0053E-11 | 6.3617E-06  |
| NiCl <sub>2</sub> (aq)                          | 3.718E-16  | 4.4968E-08  |
| NiOH <sup>+</sup>                               | 1.0023E-06 | 3.5915E-08  |
| NiSO <sub>4</sub> (aq)                          | 1.4211E-07 | 0.000024726 |
| NiCO <sub>3</sub> (aq)                          | 1.6003E-05 |             |
| NiHCO <sub>3</sub> <sup>+</sup>                 | 1.4438E-08 |             |

Table S5. Pb speciation and concentration (mol L<sup>-1</sup>) in soft water and sea water by MINTEQ.

|                                                 | Soft water | Sea Water   |
|-------------------------------------------------|------------|-------------|
| Pb(OH) <sub>2</sub> (aq)                        | 2.7798E-06 | 1.7576E-10  |
| Pb(OH) <sub>3</sub> <sup>-</sup>                | 4.4331E-06 | 1.0759E-14  |
| Pb(SO <sub>4</sub> ) <sub>2</sub> <sup>-2</sup> | 3.6944E-11 | 1.9109E-07  |
| Pb <sup>+2</sup>                                | 7.581E-11  | 5.3892E-06  |
| Pb <sub>2</sub> OH <sup>+3</sup>                | 3.5365E-16 | 6.3022E-11  |
| Pb <sub>3</sub> (OH) <sub>4</sub> <sup>+2</sup> | 1.2442E-11 | 4.1898E-15  |
| Pb <sub>4</sub> (OH) <sub>4</sub> <sup>+4</sup> | 8.0997E-18 | 2.707E-16   |
| PbCl <sup>+</sup>                               | 8.8681E-13 | 0.000024073 |
| PbCl <sub>2</sub> (aq)                          | 1.0371E-15 | 0.000010736 |
| PbCl <sub>3</sub> <sup>-</sup>                  | 8.0245E-19 | 4.0799E-06  |
| PbCl <sub>4</sub> <sup>-2</sup>                 | 4.9306E-22 | 1.2295E-06  |
| PbOH <sup>+</sup>                               | 1.0044E-07 | 2.131E-07   |
| PbSO <sub>4</sub> (aq)                          | 1.5781E-10 | 2.3527E-06  |
| PbCO <sub>3</sub> (aq)                          | 6.6368E-07 |             |
| PbHCO <sub>3</sub> <sup>+</sup>                 | 3.8204E-11 |             |
| Pb(CO <sub>3</sub> ) <sub>2</sub> <sup>-2</sup> | 4.0287E-05 |             |

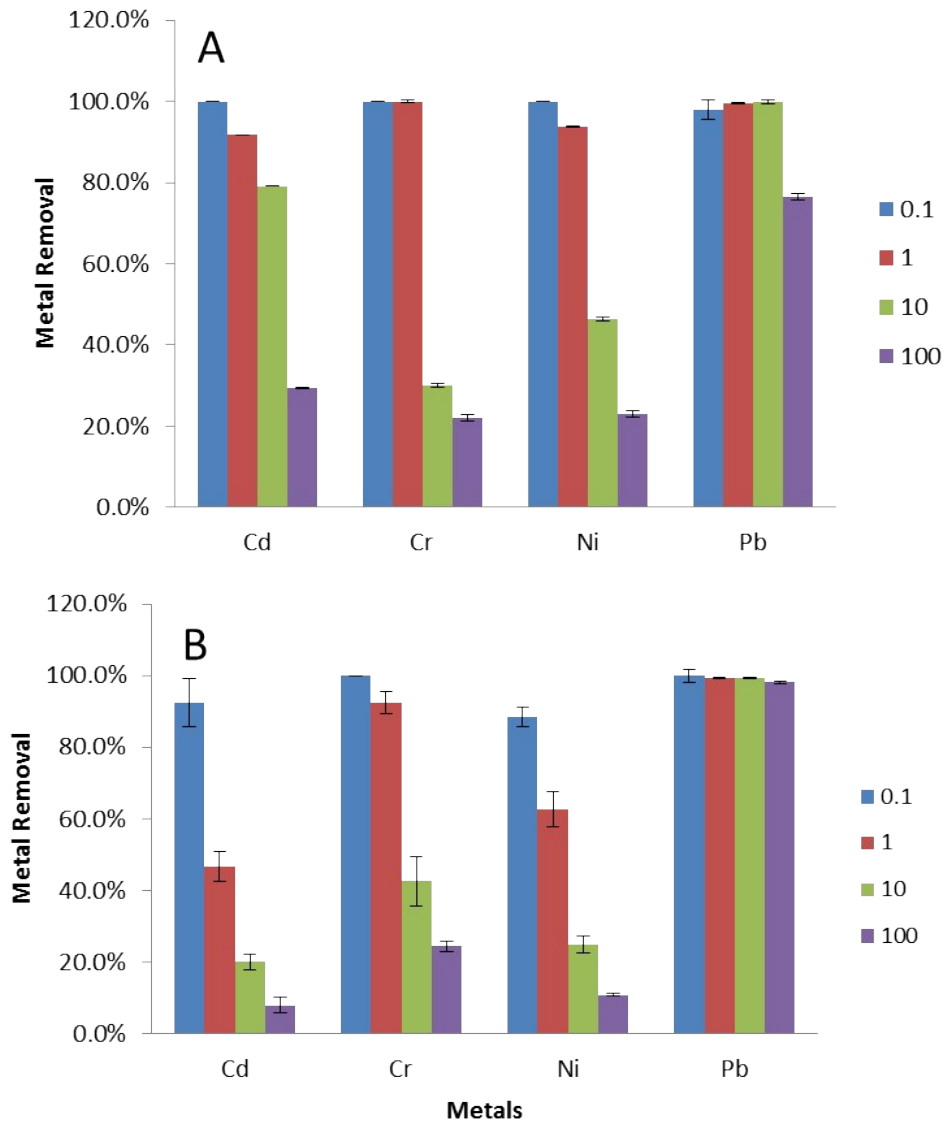

Figure S1. Effects of metal concentration ( $\text{mg L}^{-1}$ ) on removal efficiency in different water media. (A) EPA soft water, (B) EPA sea water. Data are average of three replicates.
